# Supplementary material for: Turning Defense into Offense: Defensin Mimetics as Novel Antibiotics Targeting Lipid II
Source: PubMed Central journal article supplement (PMC3820767; doi:10.1371/journal.ppat.1003732), 2013-11-07

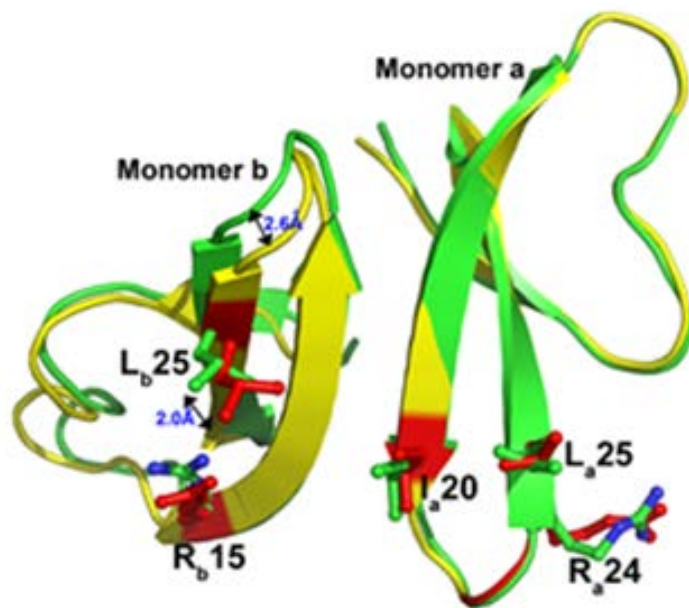

Supplement: ppat.1003732.s002.pdf [file ppat.1003732.s002.pdf]
