# Supplementary material for: Turning Defense into Offense: Defensin Mimetics as Novel Antibiotics Targeting Lipid II
Source: PubMed Central journal article supplement (PMC3820767; doi:10.1371/journal.ppat.1003732), 2013-11-07
Supplement: ppat.1003732.s005.pdf [file ppat.1003732.s005.pdf]

### Data Collection, Structure Solution, and Refinement

Prior to data collection, the crystal was rapidly soaked in well-solution containing 5% v/v glycerol and flash-cooled to 100K in a nitrogen stream. X-ray diffraction data were collected using a rotating anode X-ray generator Rigaku-MSX Micromax 7 and a Raxis-4++ image plate detector (at the X-ray Crystallography Core Facility, University of Maryland, Baltimore) and were integrated and scaled with the HKL2000 package (1). Structure was solved by the molecular replacement method with program Phaser from the CCP4 suite (2), using model based on the monomer of HNP-1 (PDB:1GNY, (3)) a probe (4) and refined with program Refmac and coupled with manual refitting and rebuilding with COOT (5). Data collection and refinement statistics are summarized in Table 1. Molecular graphics were generated using Pymol (<http://pymol.org>).

**Supplementary Table 1. Data collection and refinement statistics**

|                                     |                           |
|-------------------------------------|---------------------------|
| Space group                         | I432                      |
| Cell parameters, Å                  | a=107.0, b=107.0, c=107.0 |
| Molecules/a.u.                      | 2                         |
| Resolution, Å                       | 50-2.55 (2.59-2.55)       |
| Number of reflections               |                           |
| Total                               | 580,408                   |
| Unique                              | 6,472                     |
| R <sub>merge</sub> <sup>b</sup> , % | 11.1 (7.4)                |
| Completeness, %                     | 99.8 (99.8)               |
| Redundancy                          | 8.8 (8.9.)                |
| I/σ, (I)                            | 19.3 (2.3)                |
| Resolution, Å                       | 20-2.55                   |
| R <sup>c</sup> , %                  | 20.8                      |
| R <sub>free</sub> <sup>d</sup> , %  | 23.6                      |
| No. of protein atoms                | 476                       |
| No. of solvent molecules            | 15                        |
| No. of heteroatoms                  | 17                        |
| Root mean square deviation          |                           |
| Bond lengths, Å                     | 0.015                     |
| Bond angles, °                      | 1.54                      |

<sup>a</sup>All data (outer shell).

<sup>b</sup> $R_{\text{merge}} = \sum |I - \langle I \rangle| / \sum I$ , where  $I$  is the observed intensity and  $\langle I \rangle$  is the average intensity obtained from multiple observations of symmetry-related reflections after rejections

<sup>c</sup> $R = \sum ||F_o| - |F_c|| / \sum |F_o|$ , where  $F_o$  and  $F_c$  are the observed and calculated structure factors, respectively

<sup>d</sup> $R_{\text{free}}$  = defined by by Brünger (6)

1. Otwinowski, Z., Minor, W., and Charles W. Carter, Jr. (1997) Processing of X-ray diffraction data collected in oscillation mode. in *Methods in Enzymology*, Academic Press. pp 307-326
2. (1994) *Acta Crystallogr D Biol Crystallogr* **50**, 760-763
3. Wei, G., de Leeuw, E., Pazgier, M., Yuan, W., Zou, G., Wang, J., Ericksen, B., Lu, W. Y., Lehrer, R. I., and Lu, W. (2009) *J Biol Chem* **284**, 29180-29192
4. Szyk, A., Wu, Z., Tucker, K., Yang, D., Lu, W., and Lubkowski, J. (2006) *Protein Sci* **15**, 2749-2760
5. Emsley, P., and Cowtan, K. (2004) *Acta Crystallogr D Biol Crystallogr* **60**, 2126-2132
6. Brunger, A. T. (1992) *Nature* **355**, 472-475
