# Supplementary material for: Turning Defense into Offense: Defensin Mimetics as Novel Antibiotics Targeting Lipid II
Source: PubMed Central journal article supplement (PMC3820767; doi:10.1371/journal.ppat.1003732), 2013-11-07
Supplement: ppat.1003732.s006.pdf [file ppat.1003732.s006.pdf]

**Supplementary Table 2.** Cluster statistics of the HADDOCK docking run calculated on the top 4 members of each cluster.

|                                                                                           | <b>Cluster 1</b> | <b>Cluster 2</b> |
|-------------------------------------------------------------------------------------------|------------------|------------------|
| Cluster rank                                                                              | 1                | 1                |
| Cluster population                                                                        | 296              | 103              |
| RMSD from overall lowest-energy structure (Å)                                             | 1.25 ± 0.72      | 4.07 ± 0.07      |
| HADDOCK score <sup>a</sup> (a.u.)                                                         | -35.7 ± 0.1      | -26.4 ± 2.0      |
| Intermolecular van der Waals energy <sup>b</sup> ( $E_{vdw}$ )(kcal mol <sup>-1</sup> )   | -18.9 ± 5.0      | -14.7 ± 2.4      |
| Intermolecular electrostatic energy <sup>b</sup> ( $E_{elec}$ ) (kcal mol <sup>-1</sup> ) | -69.9 ± 15.4     | -61.5 ± 7.6      |
| Desolvation energy <sup>c</sup> ( $E_{desol}$ ) (kcal mol <sup>-1</sup> )                 | -3.4 ± 2.7       | -0.8 ± 1.5       |
| Restraints violation energy ( $E_{AIR}$ ) (kcal mol <sup>-1</sup> )                       | 0.6 ± 0.2        | 1.4 ± 0.8        |
| Buried surface area (Å <sup>2</sup> )                                                     | 646 ± 71         | 649 ± 32         |

- The HADDOCK score is defined as:  $1.0 E_{vdw} + 0.2 E_{elec} + 1.0 E_{desol} + 0.1 E_{AIR}$
- Non-bonded interactions were calculated with the OPLS force field (Jorgensen W, Tirado-Rives J. The OPLS potential functions for proteins. Energy minimizations for crystals of cyclic peptides and crambin. *J Am Chem Soc* 1988;110(6):1657–1666) using a 8.5 Å cut-off.
- Calculated using the empirical desolvation energy parameters from Fernandez-Recio et al (Fernández-Recio J, Totrov M, Abagyan R. Identification of protein-protein interaction sites from docking energy landscapes. *J Mol Biol* 2004;335(3):843–865).
