# Supplementary material for: Turning Defense into Offense: Defensin Mimetics as Novel Antibiotics Targeting Lipid II
Source: PubMed Central journal article supplement (PMC3820767; doi:10.1371/journal.ppat.1003732), 2013-11-07
Supplement: ppat.1003732.s007.pdf [file ppat.1003732.s007.pdf]

| ID      | structural formula                                                                  | chemical formula                                              | colored? | MW (g/ mol) | IUPAC name                                                        | MFR         | Binding on Lipid II? | active against S.aureus | active against E.coli | cytotoxic for Caco II (C <sub>50%</sub> survival) | cytotoxic for Jurkat (C <sub>50%</sub> survival) | compound category | Nr. |
|---------|-------------------------------------------------------------------------------------|---------------------------------------------------------------|----------|-------------|-------------------------------------------------------------------|-------------|----------------------|-------------------------|-----------------------|---------------------------------------------------|--------------------------------------------------|-------------------|-----|
| 5457685 | 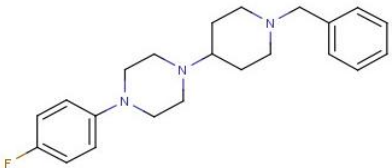   | C <sub>22</sub> H <sub>28</sub> F N <sub>3</sub>              | no       | 353.5       | 1-(1-benzyl-4-piperidinyl)-4-(4-fluorophenyl)piperazine           | Chem Bridge | No                   | No                      | No                    | No                                                | ?                                                | A                 | 1   |
| 5452876 |    | C <sub>16</sub> H <sub>23</sub> F <sub>3</sub> N <sub>2</sub> | no       | 300.4       | 1-propyl-N-[3-(trifluoromethyl)benzyl]-4-piperidinamine           | Chem Bridge | No                   | No                      | No                    | No                                                | ?                                                | A                 | 2   |
| 5270046 |    | C <sub>23</sub> H <sub>23</sub> Cl N <sub>2</sub>             | no       | 362.9       | 1-(4-biphenylmethyl)-4-(4-chlorophenyl)piperazine                 | Chem Bridge | No                   | No                      | No                    | No                                                | ?                                                | A                 | 3   |
| 6711103 |  | C <sub>23</sub> H <sub>30</sub> F N <sub>3</sub>              | no       | 367.5       | 1-(2-fluorophenyl)-4-[1-(4-methylbenzyl)-4-piperidinyl]piperazine | Chem Bridge | No                   | No                      | No                    | No                                                | ?                                                | A                 | 4   |
| 5418391 |  | C <sub>25</sub> H <sub>23</sub> F <sub>3</sub> N <sub>2</sub> | no       | 408.5       | 1-(9H-fluoren-2-ylmethyl)-4-[3-(trifluoromethyl)phenyl]piperazine | Chem Bridge | No                   | No                      | No                    | Yes (159)                                         | ?                                                | A                 | 5   |

plate A

|         |                                                                                     |                                       |    |       |                                                                              |             |     |    |    |           |   |    |    |
|---------|-------------------------------------------------------------------------------------|---------------------------------------|----|-------|------------------------------------------------------------------------------|-------------|-----|----|----|-----------|---|----|----|
| 5267798 | 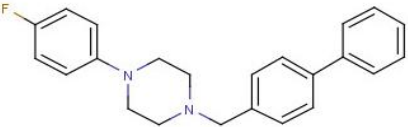   | $C_{23} H_{23} F N_2$                 | no | 346.4 | 1-(4-biphenylmethyl)-4-(4-fluorophenyl)piperazine                            | Chem Bridge | No  | No | No | No        | ? | A  | 6  |
| 6785396 |    | $C_{24} H_{33} N_3 \cdot C_2 H_2 O_4$ | no | 453.6 | 1-phenyl-4-[1-(3-phenylpropyl)-4-piperidinyl]piperazine oxalate              | Chem Bridge | No  | No | No | Yes (168) | ? | A  | 7  |
| 5422765 |    | $C_{19} H_{21} F_3 N_2$               | no | 334.4 | 1-(2-phenylethyl)-4-[3-(trifluoromethyl)phenyl]piperazine                    | Chem Bridge | Yes | No | No | Yes (130) | ? | A* | 8  |
| 5230300 |   | $C_{42} H_{40} N_2 \cdot 2 Cl H$      | no | 645.7 | N,N,N',N'-tetrakis(3-phenyl-2-propyn-1-yl)-1,6-hexanediamine dihydrochloride | Chem Bridge | No  | No | No | No        | ? | A  | 9  |
| 5230313 |  | $C_{28} H_{44} N_2 \cdot 2 Cl H$      | no | 481.6 | 3,3'-(1,4-phenylene) bis(N,N-dibutyl-2-propyn-1-amine) dihydrochloride       | Chem Bridge | Yes | No | No | Yes (366) | ? | A* | 10 |

|           |                                                                                     |                                                               |       |       |                                                                            |             |     |              |             |             |   |      |    |
|-----------|-------------------------------------------------------------------------------------|---------------------------------------------------------------|-------|-------|----------------------------------------------------------------------------|-------------|-----|--------------|-------------|-------------|---|------|----|
| 7771-0701 | 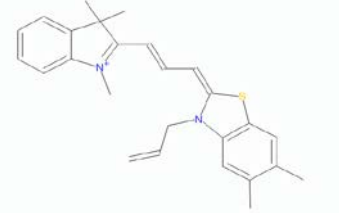   | C <sub>26</sub> H <sub>29</sub> N <sub>2</sub> S              | yes   | 401.6 | n/a                                                                        | Chem Div    | Yes | Yes (15.625) | Yes (31.25) | Yes (16,7)  | ? | B/C* | 11 |
| 8006-3639 |    | C <sub>28</sub> H <sub>44</sub> N <sub>2</sub>                | no    | 408.7 | n/a                                                                        | Chem Div    | No  | Yes (125)    | Yes (125)   | Yes (3,6)   | ? | B    | 12 |
| 1499-1221 |    | C <sub>27</sub> H <sub>24</sub> N O                           | yes   | 378.5 | n/a                                                                        | Chem Div    | No  | Yes (1.95)   | Yes (125)   | Yes (8,9)   | ? | B/C  | 13 |
| 5429346   |   | C <sub>22</sub> H <sub>29</sub> N <sub>3</sub>                | (yes) | 335.5 | 4-[3-(4-benzyl-1-piperaziny)-1-propen-1-yl]-N,N-dimethylaniline            | Chem Bridge | Yes | Yes (500)    | No          | Yes (131,9) | ? | C*   | 14 |
| 0251-0215 |  | C <sub>19</sub> H <sub>15</sub> F O <sub>2</sub>              | no    | 294.3 | n/a                                                                        | Chem Div    | No  | Yes (125)    | No          | Yes (17,1)  | ? | B/C  | 15 |
| 5427129   |  | C <sub>22</sub> H <sub>28</sub> F <sub>3</sub> N <sub>3</sub> | no    | 391.5 | N,N-diethyl-4-({4-[3-(trifluoromethyl)phenyl]-1-piperaziny)methyl} aniline | Chem Bridge | Yes | (No)         | No          | Yes (192,2) | ? | A*   | 16 |

plate C

|           |                                                                                     |                                                                                 |    |       |                                                                                                                 |             |    |           |    |             |   |     |    |
|-----------|-------------------------------------------------------------------------------------|---------------------------------------------------------------------------------|----|-------|-----------------------------------------------------------------------------------------------------------------|-------------|----|-----------|----|-------------|---|-----|----|
| 4636-0141 | 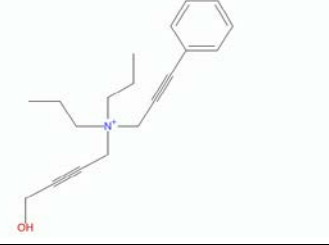   | C <sub>19</sub> H <sub>26</sub> N O                                             | no | 284.4 | (4-hydroxybut-2-yn-1-yl)(3-phenylprop-2-yn-1-yl)dipropylazanium                                                 | Chem Div    | No | No        | No | No          | ? | A   | 17 |
| 5100015   |    | C <sub>21</sub> H <sub>16</sub> O                                               | no | 284.4 | pentacyclo[6.6.6.0-2,7~.0-9,14~.0-15,20]-jicosa-2,4,6,9,11,13,15,17,19-nonaen-4-ylmethanol                      | Chem Bridge | No | Yes (500) | No | Yes (68)    | ? | B/C | 18 |
| 0438-0367 |    | C <sub>14</sub> H <sub>20</sub> F <sub>2</sub> O <sub>4</sub><br>S <sub>4</sub> | no | 418.6 | 2-((2,5-difluoro-3,4,6-tris((2-hydroxyethyl)sulfanyl)phenyl)sulfanyl)ethan-1-ol                                 | Chem Div    | No | No        | No | No          | ? | A   | 19 |
| N050-0022 |   | C <sub>27</sub> H <sub>46</sub> O                                               | no | 386.7 | 2,15-dimethyl-14-(6-methylheptan-2-yl)tetracyclo[8.7.0.0 <sup>2,7</sup> .0 <sup>11,15</sup> ]heptadec-7-en-5-ol | Chem Div    | No | No        | No | Yes (122,9) | ? | A   | 20 |
| 5607-0206 |  | C <sub>22</sub> H <sub>28</sub> F N <sub>3</sub>                                | no | 353.5 | 1-{1-[(2-fluorophenyl)methyl]piperidin-4-yl}-4-phenylpiperazine                                                 | Chem Div    | No | No        | No | No          | ? | A   | 21 |

|           |                                                                                     |                                                               |     |       |                                                                                |             |     |           |           |             |   |     |    |
|-----------|-------------------------------------------------------------------------------------|---------------------------------------------------------------|-----|-------|--------------------------------------------------------------------------------|-------------|-----|-----------|-----------|-------------|---|-----|----|
| 5400-0379 | 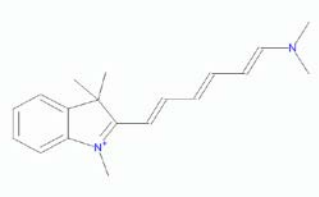   | C <sub>19</sub> H <sub>25</sub> N <sub>2</sub>                | yes | 281.4 | n/a                                                                            | Chem Div    | No  | Yes (125) | No        | Yes (55,8)  | ? | B/C | 22 |
| 2729-1114 |    | C <sub>17</sub> H <sub>18</sub> O S <sub>2</sub>              | no  | 302.5 | 4-(7,8-dimethyl-3,5-dihydro-1H-2,4-benzodithiepin-3-yl) phenol                 | Chem Div    | No  | No        | No        | Yes (119,1) | ? | A   | 23 |
| 000A-0859 |    | C <sub>24</sub> H <sub>54</sub> N <sub>6</sub>                | no  | 426.7 | (3-{3,5-bis [3-(diethylamino)propyl]-1,3,5-triazinan-1-yl}propyl) diethylamine | Chem Div    | Yes | Yes (500) | Yes (500) | Yes (418,6) | ? | B*  | 24 |
| 5210734   |    | C <sub>17</sub> H <sub>20</sub> O <sub>2</sub> S <sub>2</sub> | no  | 320.5 | 2,2'-(methylenebis(4,1-phenylene)) diethanol                                   | Chem Bridge | No  | No        | No        | No          | ? | A   | 25 |
| 5230234   |  | C <sub>16</sub> H <sub>18</sub> O <sub>2</sub> S <sub>2</sub> | no  | 306.4 | 2,2'-(4,4'-biphenyldiyl)bis(thio) diethanol                                    | Chem Bridge | No  | No        | No        | No          | ? | A   | 26 |
| 5460400   |  | C <sub>18</sub> H <sub>23</sub> NO                            | no  | 269.4 | 4-(3-((2-phenylethyl)amino)butyl) phenol                                       | Chem Bridge | No  | No        | No        | No          | ? | A   | 27 |
| 7191067   |  | C <sub>24</sub> H <sub>22</sub> O <sub>2</sub>                | no  | 342.4 | 4,4'-(1,2-ethynediyl)di-4,1-phenylene bis(2-methyl-3-butyn-2-ol)               | Chem Bridge | No  | No        | No        | No          | ? | A   | 28 |

pl

plate E (+ DMSO)

|         |                                                                                    |                               |    |       |                                                                                        |                |     |           |    |               |   |    |    |
|---------|------------------------------------------------------------------------------------|-------------------------------|----|-------|----------------------------------------------------------------------------------------|----------------|-----|-----------|----|---------------|---|----|----|
| 7411164 |   | $C_{14}H_{20}F_2O_4$<br>$S_4$ | no | 418.6 | 2,2',2''-<br>[[3,6-difluorobenzene-<br>1,2,4,5-tetrayl]tetrakis<br>(thio)]tetraethanol | Chem<br>Bridge | No  | No        | No | No            | ? | A  | 29 |
| 4431/1  |   | $C_{22}H_{23}N_2$             | No | 315.4 | 1,3,3-trimethyl-2-<br>(2-(2-methyl-1H-indol-1-yl)<br>vinyl)-3H-1λ <sup>5</sup> -indole | NCI            | No  | Yes (250) | No | No            | ? | C  | 31 |
| 55870/1 |   | $C_{23}H_{21}NO$              | No | 327.4 | N,N-dimethyl-4-<br>(2-phenyl-4H-chromen-4-yl)<br>aniline                               | NCI            | Yes | Yes (250) | No | Yes<br>(25,9) | ? | C* | 32 |
| 35487/2 |  | $C_{24}H_{28}N_2O$            | No | 360.5 | 2,2-bis<br>(4-(dimethylamino)phenyl)-<br>1-phenylethanol                               | NCI            | No  | No        | No | No            | ? | A  | 33 |

|           |                                                                                     |                                                               |     |       |                                                                                                                                  |          |     |              |              |            |   |      |    |
|-----------|-------------------------------------------------------------------------------------|---------------------------------------------------------------|-----|-------|----------------------------------------------------------------------------------------------------------------------------------|----------|-----|--------------|--------------|------------|---|------|----|
| 96932/4   | 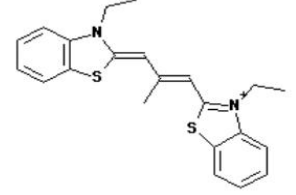   | C <sub>22</sub> H <sub>23</sub> N <sub>2</sub> S <sub>2</sub> | Yes | 379.6 | 3-ethyl-2-(3-(3-ethyl-1,3-benzothiazol-2(3H)-ylidene)-2-methyl-1-propenyl)-1,3λ <sup>5</sup> -benzothiazole                      | NCI      | No  | Yes (15,6)   | Yes (15.625) | Yes (19)   | ? | B    | 34 |
| 625586/1  |    | C <sub>18</sub> H <sub>16</sub> O <sub>2</sub>                | No  | 264.3 | 2-(4H-cyclopenta[def]phenanthren-4-yl)-1,3-propanediol                                                                           | NCI      | No  | No           | No           | Yes (83,8) | ? | A    | 35 |
| 610995/1  |    | C <sub>21</sub> H <sub>18</sub> O                             | No  | 286.4 | 4-(9H-fluoren-9-yl)-2,6-dimethylphenol                                                                                           | NCI      | Yes | Yes (125)    | No           | Yes (9,2)  | ? | B/C* | 36 |
| 290437/2  |   | C <sub>30</sub> H <sub>27</sub> N <sub>2</sub> S <sub>2</sub> | Yes | 479.7 | 1-ethyl-2-(3-(1-ethylnaphtho[1,2-d][1,3]thiazol-2(1H)-ylidene)-2-methyl-1-propenyl)-1λ <sup>5</sup> -naphtho[1,2-d][1,3]thiazole | NCI      | No  | Yes (1,95)   | Yes (31.35)  | Yes (2,2)  | ? | B/C  | 37 |
| 4090-1978 |  | C <sub>27</sub> H <sub>31</sub> N <sub>2</sub> S              | Yes | 415.6 | 2-(((1E)-5,5-dimethyl-3-((E)-2-[methyl(phenyl)amino]ethenyl)cyclohex-2-en-1-ylidene)methyl)-3-ethyl-1,3-benzothiazol-3-ium       | Chem Div | No  | Yes (15,625) | Yes (62,5)   | Yes (16,7) | ? | B/C  | 38 |

|           |                                                                                     |                        |     |       |                                                                 |          |    |            |            |             |   |     |    |
|-----------|-------------------------------------------------------------------------------------|------------------------|-----|-------|-----------------------------------------------------------------|----------|----|------------|------------|-------------|---|-----|----|
| 2332-1014 | 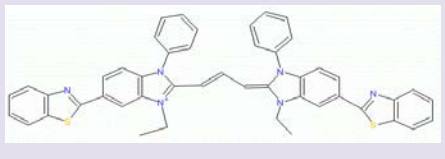   | $C_{47}H_{37}N_6S_2$   | Yes | 750.0 | n/a                                                             | Chem Div | No | Yes (62,5) | No         | Yes (22,6)  | ? | B/C | 39 |
| 4890-0291 |    | $C_{26}H_{30}N_3O_2S$  | Yes | 432.6 | n/a                                                             | Chem Div | No | Yes (7,81) | Yes (62,5) | Yes (10,7)  | ? | B/C | 40 |
| 4121-0081 |    | $C_{14}H_{12}O$        | No  | 196.2 | 9H-fluoren-9-ylmethanol                                         | Chem Div | No | No         | No         | Yes (201,8) | ? | A   | 41 |
| C611-0808 |    | $C_{20}H_{15}FN_2O_2S$ | No  | 366.4 | n/a                                                             | Chem Div | No | No         | No         | No          | ? | A   | 42 |
| 3377-0105 |  | $C_{26}H_{23}NO$       | No  | 365.5 | 4-[(2,6-diphenyl-4H-pyran-4-ylidene)methyl]-N,N-dimethylaniline | Chem Div | No | Yes (500)  | No         | Yes (100,4) | ? | A/B | 43 |

plate 2



|           |                                                                                     |                      |     |       |     |          |    |              |             |            |   |   |    |
|-----------|-------------------------------------------------------------------------------------|----------------------|-----|-------|-----|----------|----|--------------|-------------|------------|---|---|----|
| 2331-0475 | 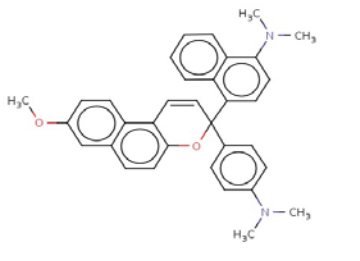   | $C_{34}H_{32}N_2O_2$ | No  | 500.6 | n/a | Chem Div | No | No           | No          | No         | ? | A | 44 |
| 7771-0699 |    | $C_{24}H_{25}N_2S$   | Yes | 373.5 | n/a | Chem Div | No | Yes (7,8)    | Yes (125)   | Yes (7,9)  | ? | B | 45 |
| 7771-0716 |    | $C_{25}H_{27}N_2O_S$ | Yes | 403.6 | n/a | Chem Div | No | Yes (15,625) | Yes (125)   | Yes (5,3)  | ? | B | 46 |
| 7771-0700 |   | $C_{25}H_{27}N_2O_S$ | Yes | 403.6 | n/a | Chem Div | No | Yes (7,8)    | Yes (62,5)  | Yes (3,7)  | ? | B | 47 |
| 7165-0606 |  | $C_{24}H_{25}N_2S$   | Yes | 373.5 | n/a | Chem Div | No | Yes (7,8)    | Yes (31,25) | Yes (11,9) | ? | B | 48 |

plate 3

|           |                                                                                     |                        |     |       |                                                                                                                           |          |     |           |           |             |   |    |    |
|-----------|-------------------------------------------------------------------------------------|------------------------|-----|-------|---------------------------------------------------------------------------------------------------------------------------|----------|-----|-----------|-----------|-------------|---|----|----|
| 7165-0758 | 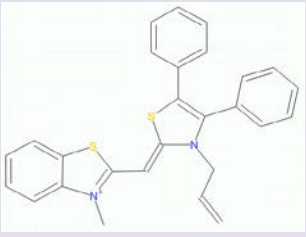   | $C_{27}H_{23}N_2S_2$   | No  | 439.6 | n/a                                                                                                                       | Chem Div | No  | Yes (7,8) | Yes (125) | Yes (6,7)   | ? | B  | 49 |
| 1492-0330 |    | $C_{26}H_{20}N_3S$     | No  | 406.5 | 5-(diphenylamino)-2,3-diphenyl-1,2,4,5-thiadiazol-2-ylum                                                                  | Chem Div | Yes | No        | No        | Yes (101,2) | ? | A* | 50 |
| 2101-0102 |    | $C_{22}H_{20}N_2O S_2$ | Yes | 392.5 | (5E)-3-phenyl-2-sulfanylidene-5-[2-[(2E)-1,3,3-trimethyl-2,3-dihydro-1H-indol-2-ylidene]ethylidene]-1,3-thiazolidin-4-one | Chem Div | No  | No        | No        | No          | ? | A  | 51 |
| 1611-0203 |   | $C_{24}H_{10}F_8O_4$   | No  | 514.3 | 2-[2,3,5,6-tetrafluoro-4-[2,3,5,6-tetrafluoro-4-(2-hydroxyphenoxy)phenyl]phenoxy]phenol                                   | Chem Div | No  | Yes (3,9) | No        | Yes (4,2)   | ? |    | 52 |
| 4896-3423 |  | $C_{22}H_{19}NO_3$     | No  | 345.4 | 1-ethyl-3,3-bis(4-hydroxyphenyl)-2,3-dihydro-1H-indol-2-one                                                               | Chem Div | No  | No        | No        | Yes (72,1)  | ? | A  | 53 |

|            |                                                                                     |                         |       |       |                                                                                                                                                |             |    |            |           |            |   |   |    |
|------------|-------------------------------------------------------------------------------------|-------------------------|-------|-------|------------------------------------------------------------------------------------------------------------------------------------------------|-------------|----|------------|-----------|------------|---|---|----|
| 5660386    | 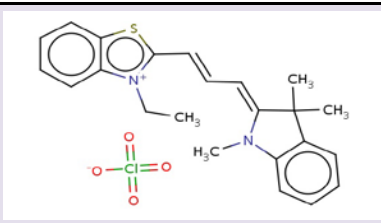   | $C_{23}H_{25}ClN_2O_4S$ | Yes   | 461.0 | 3-ethyl-2-[(1E)-3-[(2Z)-1,3,3-trimethyl-2,3-dihydro-1H-indol-2-ylidene]prop-1-en-1-yl]-1,3-benzothiazol-3-ium perchlorate                      | Chem Bridge | No | Yes (7,8)  | Yes (125) | Yes (5,6)  | ? |   | 54 |
| STK 874226 |    | $C_{22}H_{23}N_2O_2S$   | Yes   | 379.5 | 2-[(1E,3E)-4-[acetyl(phenyl)amino]buta-1,3-dien-1-yl]-3-ethyl-6-methoxy-1,3-benzothiazol-3-ium                                                 | VitasM Lab  | No | Yes (125)  | Yes (250) | No         | ? |   | 55 |
| 5119716    |    | $C_{30}H_{33}IN_2OS$    | Yes   | 596.6 | 2-[(1E)-3-[(1E)-5,5-dimethyl-3-[(E)-2-(N-phenylacetamido)ethenyl]cyclohex-2-en-1-ylidene]prop-1-en-1-yl]-3-ethyl-1,3-benzothiazol-3-ium iodide | Chem Bridge | No | Yes (125)  | No        | Yes (52,7) | ? |   | 56 |
| 5100004    |   | $C_{21}H_{14}O$         | No    | 282.3 | pentacyclo[6.6.6.0 <sup>2,7</sup> .0 <sup>9,14</sup> .0 <sup>15,20</sup> ]jicosa-2,4,6,9,11,13,15,17,19-nonaene-4-carbaldehyde                 | Chem Bridge | No | No         | No        | No         | ? | A | 57 |
| 5190620    |  | $C_{20}H_{14}O_2$       | (Yes) | 286.3 | pentacyclo[6.6.6.0 <sup>2,7</sup> .0 <sup>9,14</sup> .0 <sup>15,20</sup> ]jicosa-2(7),3,5,9,11,13,15,17,19-nonaene-3,6-diol                    | Chem Bridge | No | Yes (62,5) | No        | Yes (3,7)  | ? |   | 58 |

|                 |                                                                                     |                                                                  |     |       |                                                                                                            |             |    |              |    |           |   |   |    |
|-----------------|-------------------------------------------------------------------------------------|------------------------------------------------------------------|-----|-------|------------------------------------------------------------------------------------------------------------|-------------|----|--------------|----|-----------|---|---|----|
| 5142587         | 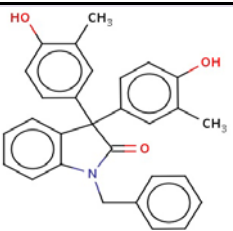   | C <sub>29</sub> H <sub>25</sub> N O <sub>3</sub>                 | No  | 435.5 | 1-benzyl-3,3-bis(4-hydroxy-3-methylphenyl)-2,3-dihydro-1H-indol-2-one                                      | Chem Bridge | No | Yes (15,625) | No | Yes (4,4) | ? |   | 59 |
| 7832238         |    | C <sub>23</sub> H <sub>21</sub> N O <sub>2</sub>                 | No  | 343.4 | 3-benzyl-3-hydroxy-2-[(4-methylphenyl)methyl]-2,3-dihydro-1H-isoindol-1-one                                | Chem Bridge | No | No           | No | No        | ? | A | 60 |
| BAS<br>00138032 |    | C <sub>26</sub> H <sub>21</sub> O <sub>2</sub>                   | Yes | 365.4 | 2-[2-(4-methoxy-phenyl)-vinyl]-4,6-diphenyl-pyranilium                                                     | Asinex      | No | No           | No | No        | ? | A | 61 |
| BAS<br>00691248 |   | C <sub>22</sub> H <sub>21</sub> N <sub>5</sub> O<br>S            | Yes | 403.5 | 2-(4-tert-butyl-thiazol-2-yl)-5-phenyl-4-(phenyl-hydrazono)-2,4-dihydro-pyrazol-3-one                      | Asinex      | No | No           | No | No        | ? | A | 62 |
| SYN<br>22879441 |  | C <sub>25</sub> H <sub>32</sub> N <sub>4</sub><br>O <sub>2</sub> | No  | 420.6 | N-Benzyl-3-(1,3-dimethyl-2-oxo-2,3-dihydro-1H-benzoimidazol-5-yl)-N-(1-methyl-piperidin-4-yl)-propionamide | Asinex      | No | No           | No | No        | ? | A | 63 |

|               |                                                                                     |                                |     |       |                                                                                                                                                                 |            |     |            |           |           |   |    |    |
|---------------|-------------------------------------------------------------------------------------|--------------------------------|-----|-------|-----------------------------------------------------------------------------------------------------------------------------------------------------------------|------------|-----|------------|-----------|-----------|---|----|----|
| ST<br>4098270 | 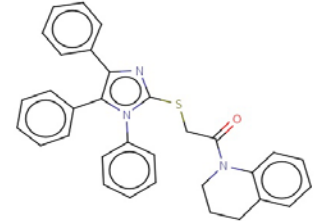   | $C_{32}H_{27}N_3O$<br>S        | No  | 501.7 | 1-(1,2,3,4-tetrahydroquinolin-1-yl)-2-[(1,4,5-triphenyl-1H-imidazol-2-yl)sulfanyl]ethan-1-one                                                                   | Tim Tec    | No  | No         | No        | No        | ? | A  | 64 |
| STK<br>792971 |    | $C_{32}H_{35}N_2S_2$           | Yes | 511.8 | 3-ethyl-2-[(E)-{3-[(1E,3E,5Z)-5-(3-ethyl-1,3-benzothiazol-2(3H)-ylidene)penta-1,3-dien-1-yl]-5,5-dimethylcyclohex-2-en-1-ylidene)methyl]-1,3-benzothiazol-3-ium | VitasM Lab | No  | Yes (62,5) | No        | No        | ? | C  | 65 |
| STK<br>537076 |    | $C_{28}H_{24}N_4S$             | No  | 448.6 | (2E)-2-[4-(2,4-dimethylphenyl)-1,3-thiazol-2-yl]-3-[(9-ethyl-9H-carbazol-3-yl)amino]prop-2-enitrile                                                             | VitasM Lab | No  | No         | No        | Yes (240) | ? | A  | 66 |
| STL05007<br>2 |   | $C_{24}H_{28}N_3$<br>$O_2$     | No  | 390.5 | 3-(4-methoxyphenyl)-1-(2-oxo-2-phenylpropan-2-ylamino)ethyl-1,5,6,7-tetrahydropyrrolo[1,2-a]imidazol-4-ium                                                      | VitasM Lab | No  | No         | No        | Yes (340) | ? | A  | 67 |
| STK<br>368153 |  | $C_{25}H_{21}N_2S_2$<br>$Se_2$ | Yes | 571.5 | 3-ethyl-2-[(1E,3E)-3-(3-ethyl[1]benzoselenopheno[2,3-d][1,3]thiazol-2(3H)-ylidene)prop-1-en-1-yl][1]benzoselenopheno[2,3-d][1,3]thiazol-3-ium                   | VitasM Lab | Yes | Yes (7,8)  | Yes (7,8) | Yes (9,6) | ? | B* | 68 |

plate

|           |                                                                                     |                     |    |       |                                                        |          |     |           |    |             |   |      |    |
|-----------|-------------------------------------------------------------------------------------|---------------------|----|-------|--------------------------------------------------------|----------|-----|-----------|----|-------------|---|------|----|
| 179415/1  | 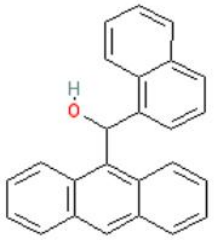   | $C_{25}H_{18}O$     | No | 334.4 | 9-anthryl(1-naphthyl)methanol                          | NCI      | Yes | Yes (3,9) | No | No          | ? | C*   | 69 |
| 363003/1  |    | $C_{27}H_{19}ClO_2$ | No | 410.9 | n/a                                                    | NCI      | Yes | Yes (3,9) | No | Yes (3,5)   | ? | B/C* | 70 |
| 55266/1   |    | $C_{17}H_{16}O$     | No | 236.3 | n/a                                                    | NCI      | Yes | No        | No | Yes (208,6) | ? | A*   | 71 |
| 1492-0330 |  | $C_{26}H_{20}N_3S$  | No | 406.5 | 5-(diphenylamino)-2,3-diphenyl-1,2,4-thiadiazol-2-ylum | Chem Div | Yes | Yes (125) | No | Yes (143,3) | ? | B/C* | 72 |

|                                                     |                                                                                    |                     |     |       |                                                                                                                               |             |     |             |           |            |   |      |                        |
|-----------------------------------------------------|------------------------------------------------------------------------------------|---------------------|-----|-------|-------------------------------------------------------------------------------------------------------------------------------|-------------|-----|-------------|-----------|------------|---|------|------------------------|
| 5107930                                             | 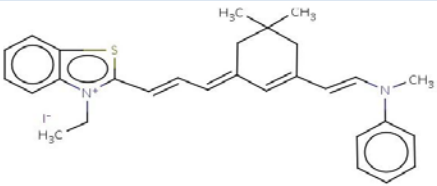  | $C_{29}H_{33}IN_2S$ | Yes | 568.6 | 2-[(1E)-3-[(1E)-5,5-dimethyl-3-[(E)-2-[methyl(phenyl)amino]ethenylidene]prop-1-en-1-yl]-3-ethyl-1,3-benzothiazol-3-ium iodide | Chem Bridge | Yes | Yes (31,25) | Yes (125) | Yes (27,9) | ? | B/C* | 73                     |
| 4090-1979                                           |   | $C_{25}H_{33}N_2S$  | Yes | 393.6 | n/a                                                                                                                           | Chem Div    | Yes | Yes (62,5)  | No        | Yes (46,2) | ? | B/C* | 74                     |
| 1493-0289                                           |   | $C_{23}H_{32}NO$    | Yes | 338.5 | 2,6-di-tert-butyl-4-[(E)-2-[4-(dimethylamino)phenyl]ethenyl]-1H-pyran-1-ium                                                   | Chem Div    | Yes | Yes (3,9)   | Yes (125) | Yes (6,8)  | ? | B/C* | 75                     |
| BAS 0012753 8                                       |  | $C_{31}H_{28}NO$    | Yes | 430.6 | 2,4-diphenyl-6-[(1E)-3-[(2E)-1,3,3-trimethyl-2,3-dihydro-1H-indol-2-ylidene]prop-1-en-1-yl]-1H-pyran-1-ium                    | Asinex      | Yes | Yes (1,95)  | Yes (7,8) | Yes (2,7)  | ? | B/C* | 76                     |
| <b>All concentrations are in <math>\mu M</math></b> |                                                                                    |                     |     |       |                                                                                                                               |             |     |             |           |            |   |      | total amount 75 + DMSO |

plate 8

| *Compound category |                                                                                                                                                                                                    |
|--------------------|----------------------------------------------------------------------------------------------------------------------------------------------------------------------------------------------------|
| A                  | <p><b>Not effective compound</b></p> <p>Not active against S.aureus<br/>           Not active or active against E.coli<br/>           Not toxic or toxic for tested cell lines</p>                 |
| B                  | <p><b>Effective but not specific</b></p> <p>Highly active against S.aureus<br/>           Highly active against E.coli<br/>           Toxic for tested cell lines</p>                              |
| C                  | <p><b>Effective and specific, antibiotic candidate</b></p> <p>Highly active against S.aureus<br/>           less active against E.coli<br/>           Not (strong) toxic for tested cell lines</p> |
| *                  | Lipid II binding                                                                                                                                                                                   |

**IC<sub>100%</sub>** Inhibitory concentration on which 100% killing of bacteria occurred, determined by no bacterial regrowth after exposure to the compound
